# Supplementary material for: Effective virus-neutralizing activities in antisera from the first wave of survivors of severe COVID-19
Source: PubMed Central journal article supplement (PMC7934937; doi:10.1172/jci.insight.146267), 2021-02-22
Supplement: jciinsight-6-146267-s233.pdf [file jciinsight-6-146267-s233.pdf]

---

**Supplemental Table S1. Clinical and Pathological Characteristics of Patients**

---

|                                                                  |                                                                                                                                                                                                                            |
|------------------------------------------------------------------|----------------------------------------------------------------------------------------------------------------------------------------------------------------------------------------------------------------------------|
| <b>Age (years)</b>                                               | 56 (37-65)                                                                                                                                                                                                                 |
| <b>Sex (n, %)</b>                                                |                                                                                                                                                                                                                            |
| Male                                                             | 60 (71.4%)                                                                                                                                                                                                                 |
| Female                                                           | 44 (57.7%)                                                                                                                                                                                                                 |
| <b>Inclusion Criteria</b><br>(Fit any one of the two conditions) | 1. oxygen saturation (Sao <sub>2</sub> ) ≤ 94% or less while breathing ambient air<br>2. ratio of the partial pressure of oxygen (Pao <sub>2</sub> ) to the fraction of inspired oxygen (Fio <sub>2</sub> ) of ≤ 300 mm Hg |
| <b>Oxygen Supplementation</b>                                    | 97 (93.3%)                                                                                                                                                                                                                 |
| <b>Ct Scan (Double lung damage) (n, %)</b>                       | 104 (100%)                                                                                                                                                                                                                 |
| <b>Positive Nucleic Acid Tests (n, %)</b>                        | 104 (100%)                                                                                                                                                                                                                 |
| <b>Course of Disease (Days)</b>                                  |                                                                                                                                                                                                                            |
| Onset to discharge                                               | 25 (22, 30)                                                                                                                                                                                                                |
| Onset to convalescent phase sampling point                       | 195 (188, 201)                                                                                                                                                                                                             |
| Onset to acute phase sampling point                              | 23 (20, 27)                                                                                                                                                                                                                |
| Acute phase sampling point to convalescent phase sampling point  | 172 (167, 176)                                                                                                                                                                                                             |

---
